# Supplementary material for: A Fatty Acid Based Bayesian Approach for Inferring Diet in Aquatic Consumers
Source: PLoS One. 2015 Jun 26;10(6):e0129723. doi: 10.1371/journal.pone.0129723 (PMC4482665; doi:10.1371/journal.pone.0129723)
Supplement: S1 Table — (DOC) [file pone.0129723.s003.doc]

**S1 Table. The FA composition of phytoplankton monocultures and *Daphnia* fed these monocultures.** These data are reported as the percent of total fatty acids. The values reported in the lower panel are the respective r2 values between the two dataset. The values in bold font indicate the fatty acids molecules that best differentiated between the different diet types.
